# Supplementary material for: Water-soluble iron correlation to primary speciated organics in low-emitting vehicle exhaust
Source: Copernicus journal article supplement (doi:10.5194/acp-2019-386), 2019-09-19

## **Supporting Information For:**

# **Water-soluble iron correlation to speciated organics in low-emitting vehicle exhaust**

Joseph R. Salazar\*, Benton T. Cartledge\*, John P. Haynes\*, Rachel York-Marini\*, Allen L Robinson<sup>‡</sup>, Greg T. Drozd<sup>€</sup>, Allen H. Goldstein<sup>¥</sup>, Sirine C. Fakra<sup>¢</sup>, Brian J. Majestic\*

\*University of Denver, Department of Chemistry and Biochemistry

<sup>‡</sup>Carnegie Mellon University, College of Engineering

<sup>¥</sup>University of California, Berkeley Department of Civil and Environmental Engineering

<sup>€</sup>Colby College Department of Chemistry

<sup>¢</sup>Advanced Light Source, Lawrence Berkeley National Laboratory, Berkeley, CA 94720

## **Summary of Supporting Information:**

11 Pages (excluding cover): SI1- SI8

- SI1. Linear correlation plots for sulfate, organic carbon (OC), CO<sub>2</sub> and EF to water-soluble iron.
- SI2: Linear correlation plots for total iron to water-soluble iron
- SI3: Table of R<sup>2</sup> Values for water-soluble iron correlation to organic species
- SI4. Table of Least-square linear combination fitting (LCF) of Fe K-edge XANES
- SI5. Classification of Fe-bearing standards
- SI6. Percentage distribution of the pseudo-mineral groups
- SI7. Table of R<sup>2</sup> values of different IVOC and water-soluble iron.
- SI8. Linear correlation plots for vehicle mileages to water-soluble iron

Figure S11: Linear correlation plots representing EF in mg kg-fuel<sup>-1</sup> for sulfate, organic carbon (OC), CO<sub>2</sub> and EF in μg kg-fuel<sup>-1</sup> for water-soluble iron. Correlation lines and R<sup>2</sup> values for all elements are shown.

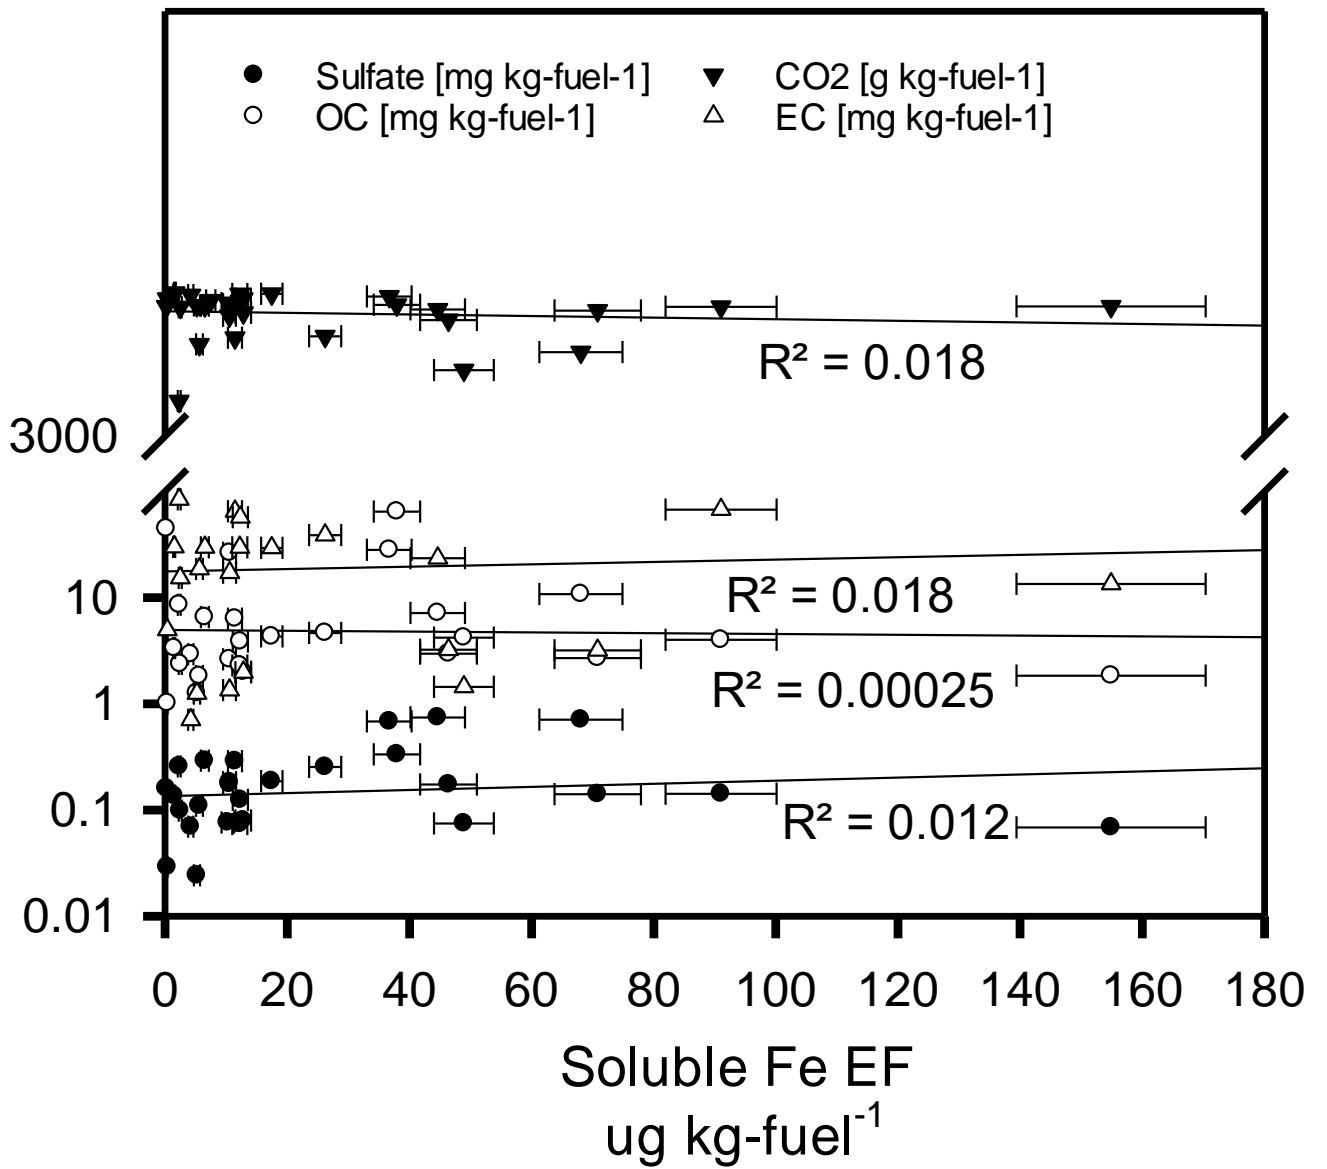

Figure SI2: Linear correlation plots representing EF in  $\mu\text{g kg-fuel}^{-1}$  for water-soluble iron and total iron. Correlation lines and  $R^2$  shown.

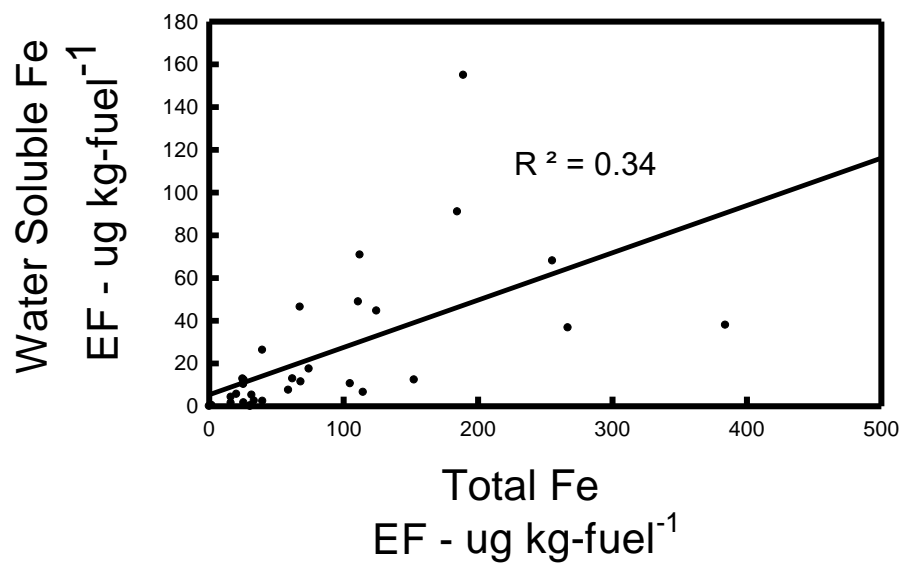

Figure SI3: Water-soluble irons correlation to organic species. (M = methyl, E = Ethyl, CY = Cyclo)

| Organic Name            | Relationship to water-soluble iron (R <sup>2</sup> ) |
|-------------------------|------------------------------------------------------|
| (1-ME)benzene           | 0.06                                                 |
| (1-Mpropyl)benzene      | 0.04                                                 |
| (2-Mpropyl)benzene      | 0.00                                                 |
| 1,2,3,4-tetraMbenzene   | 0.04                                                 |
| 1,2,3,5-tetraMbenzene   | 0.04                                                 |
| 1,2,3-triMbenzene       | 0.05                                                 |
| 1,2,4,5-tetraMbenzene   | 0.06                                                 |
| 1,2,4-triM-CYpentane    | 0.03                                                 |
| 1,2,4-triMbenzene       | 0.07                                                 |
| 1,2-butadiene           | 0.04                                                 |
| 1,2-diEbenzene          | 0.03                                                 |
| 1,2-diM-3-Ebenzene      | 0.03                                                 |
| 1,2-diM-4-Ebenzene      | 0.06                                                 |
| 1,2-propadiene          | 0.01                                                 |
| 1,3,5-triM-CYhexane     | 0.07                                                 |
| 1,3,5-triMbenzene       | 0.09                                                 |
| 1,3-CYpentadiene        | 0.00                                                 |
| 1,3-butadiene           | 0.03                                                 |
| 1,3-butadiyne           | 0.00                                                 |
| 1,3-di-npropylbenzene   | 0.02                                                 |
| 1,3-diEbenzene          | 0.08                                                 |
| 1,3-diM-2-Ebenzene      | 0.00                                                 |
| 1,3-diM-4-Ebenzene      | 0.05                                                 |
| 1,3-diM-5-Ebenzene      | 0.05                                                 |
| 1,4-diEbenzene          | 0.03                                                 |
| 1,4-diM-2-Ebenzene      | 0.07                                                 |
| 1-(diME)-2-Mbenzene     | 0.00                                                 |
| 1-(diME)-3,5-diMbenzene | 0.03                                                 |
| 1-E-2-npropylbenzene    | 0.03                                                 |
| 1-E-tertbutylether      | 0.00                                                 |
| 1-M-2-(1-ME)benzene     | 0.04                                                 |
| 1-M-2-Ebenzene          | 0.05                                                 |
| 1-M-2-n-butylbenzene    | 0.10                                                 |
| 1-M-2-n-propylbenzene   | 0.05                                                 |
| 1-M-3-(1-ME)benzene     | 0.04                                                 |
| 1-M-3-Ebenzene          | 0.08                                                 |
| 1-M-3-n-propylbenzene   | 0.05                                                 |

|                       |      |
|-----------------------|------|
| 1-M-4-(1-ME)benzene   | 0.03 |
| 1-M-4-ECYhexane       | 0.38 |
| 1-M-4-Ebenzene        | 0.07 |
| 1-M-4-n-propylbenzene | 0.05 |
| 1-MCYpentene          | 0.00 |
| 1-buten-3-yne         | 0.15 |
| 1-butene              | 0.07 |
| 1-butyne              | 0.00 |
| 1-heptene             | 0.00 |
| 1-hexene              | 0.01 |
| 1-nonene              | 0.03 |
| 1-octene              | 0.00 |
| 1-pentene             | 0.04 |
| 1-propyne             | 0.00 |
| 1a,2a,3b-triMCPentane | 0.07 |
| 2,2,3-triMbutane      | 0.15 |
| 2,2,4-triMheptane     | 0.03 |
| 2,2,4-triMhexane      | 0.04 |
| 2,2,4-triMpentane     | 0.00 |
| 2,2,5-triMheptane     | 0.05 |
| 2,2,5-triMhexane      | 0.01 |
| 2,2-diM-octane        | 0.02 |
| 2,2-diMhexane         | 0.00 |
| 2,2-diMpentane        | 0.02 |
| 2,2-diMpropane        | 0.00 |
| 2,3,3-triMpentane     | 0.00 |
| 2,3,4-triMpentane     | 0.04 |
| 2,3,5-triMhexane      | 0.04 |
| 2,3-diM-1-butene      | 0.06 |
| 2,3-diM-2-pentene     | 0.01 |
| 2,3-diM-octane        | 0.00 |
| 2,3-diMbutane         | 0.02 |
| 2,3-diMheptane        | 0.01 |
| 2,3-diMhexane         | 0.08 |
| 2,3-diMpentane        | 0.03 |
| 2,4,4-triM-1-pentene  | 0.01 |
| 2,4,4-triM-2-pentene  | 0.31 |
| 2,4,4-triMhexane      | 0.07 |
| 2,4-diM-1-pentene     | 0.01 |
| 2,4-diM-2-pentene     | 0.00 |
| 2,4-diM-octane        | 0.01 |
| 2,4-diMheptane        | 0.07 |

|                   |      |
|-------------------|------|
| 2,4-diMhexane     | 0.04 |
| 2,4-diMpentane    | 0.04 |
| 2,5-diM-octane    | 0.05 |
| 2,5-diMhexane     | 0.04 |
| 2,6-diM-octane    | 0.00 |
| 2,6-diMheptane    | 0.01 |
| 2-M-1,3-butadiene | 0.16 |
| 2-M-1-butene      | 0.11 |
| 2-M-1-pentene     | 0.12 |
| 2-M-2-butene      | 0.20 |
| 2-M-2-hexene      | 0.05 |
| 2-M-2-pentene     | 0.12 |
| 2-M-indan         | 0.05 |
| 2-M-octane        | 0.00 |
| 2-M-t-3-hexene    | 0.06 |
| 2-Mbutane         | 0.01 |
| 2-Mheptane        | 0.04 |
| 2-Mhexane         | 0.04 |
| 2-Mnonane         | 0.05 |
| 2-Mpentane        | 0.03 |
| 2-Mpropene        | 0.06 |
| 2-butyne          | 0.00 |
| 3,3-diM-1-butene  | 0.00 |
| 3,3-diM-octane    | 0.05 |
| 3,3-diMhexane     | 0.58 |
| 3,3-diMpentane    | 0.01 |
| 3,4-diM-1-pentene | 0.03 |
| 3,4-diMhexane     | 0.03 |
| 3,5-diMheptane    | 0.06 |
| 3-E-2-pentene     | 0.05 |
| 3-Epentane        | 0.04 |
| 3-M-1-butene      | 0.06 |
| 3-M-1-hexene      | 0.00 |
| 3-M-1-pentene     | 0.01 |
| 3-M-c-2-hexene    | 0.25 |
| 3-M-c-2-pentene   | 0.00 |
| 3-Moctane         | 0.05 |
| 3-M-t-2-pentene   | 0.55 |
| 3-M-t-3-hexene    | 0.01 |
| 3-MCYpentene      | 0.02 |
| 3-Mheptane        | 0.03 |
| 3-Mhexane         | 0.04 |

|                    |      |
|--------------------|------|
| 3-Mpentane         | 0.02 |
| 4-M-1-pentene      | 0.01 |
| 4-M-c-2-pentene    | 0.00 |
| 4-M-indan          | 0.03 |
| 4-M-octane         | 0.06 |
| 4-M-t-2-hexene     | 0.01 |
| 4-M-t-2-pentene    | 0.05 |
| 4-Mheptane         | 0.04 |
| 5-M-indan          | 0.08 |
| CYhexane           | 0.00 |
| CYhexene           | 0.04 |
| CYpentane          | 0.02 |
| CYpentene          | 0.18 |
| ECYhexane          | 0.10 |
| ECYpentane         | 0.05 |
| Ebenzene           | 0.09 |
| Ethane             | 0.00 |
| M-tertbutyl-ether  | 0.00 |
| MCYhexane          | 0.02 |
| MCYpentane         | 0.03 |
| MEketone           | 0.00 |
| Methane            | 0.00 |
| Mpropane           | 0.00 |
| acetaldehyde       | 0.03 |
| acetone            | 0.06 |
| acrolein           | 0.02 |
| benzaldehyde       | 0.02 |
| benzene            | 0.09 |
| butyraldehyde      | 0.03 |
| c-1,2-diMCYhexane  | 0.19 |
| c-1,3-diMCYhexane  | 0.04 |
| c-1,3-diMCYpentane | 0.03 |
| c-1-M-3-ECYpentane | 0.00 |
| c-2-butene         | 0.10 |
| c-2-heptene        | 0.01 |
| c-2-hexene         | 0.10 |
| c-2-octene         | 0.02 |
| c-2-pentene        | 0.04 |
| c-3-hexene         | 0.16 |
| crotonaldehyde     | 0.00 |
| ethanol            | 0.06 |
| ethene             | 0.07 |

|                    |      |
|--------------------|------|
| ethyne             | 0.01 |
| formaldehyde       | 0.04 |
| hexanal            | 0.00 |
| indan              | 0.10 |
| m-tolualdehyde     | 0.01 |
| m-xylene           | 0.07 |
| methacrolein       | 0.03 |
| methanol           | 0.00 |
| n-butane           | 0.00 |
| n-decane           | 0.02 |
| n-dodecane         | 0.02 |
| n-heptane          | 0.05 |
| n-hexane           | 0.03 |
| n-nonane           | 0.04 |
| n-octane           | 0.04 |
| n-pentane          | 0.01 |
| n-pentylbenzene    | 0.03 |
| n-propylbenzene    | 0.05 |
| n-undecane         | 0.04 |
| o-xylene           | 0.07 |
| p-xylene           | 0.07 |
| propane            | 0.01 |
| propene            | 0.06 |
| propionaldehyde    | 0.08 |
| styrene            | 0.04 |
| t-1,2-diMCPentane  | 0.04 |
| t-1,3-diMCPentane  | 0.04 |
| t-1,3-diMCPentane  | 0.05 |
| t-1,3-pentadiene   | 0.00 |
| t-1,4-diMCPentane  | 0.04 |
| t-1-M-3-ECYPentane | 0.05 |
| t-2-butene         | 0.07 |
| t-2-heptene        | 0.06 |
| t-2-hexene         | 0.03 |
| t-2-octene         | 0.08 |
| t-2-pentene        | 0.04 |
| t-3-heptene        | 0.10 |
| t-3-hexene         | 0.02 |
| t-4-octene         | 0.48 |
| toluene            | 0.08 |
| valeraldehyde      | 0.04 |



Figure SI4: Results of Least-square linear combination fitting (LCF) of Fe K-edge XANES. Spectra were fitted in the range 7090 to 7365 eV.

| Sample | %  | Component 1             | %  | Component 2            | %  | Component 3         | Sum | NSS x10 <sup>-4</sup> |
|--------|----|-------------------------|----|------------------------|----|---------------------|-----|-----------------------|
| 1      | 50 | Biogenic FeIII oxyhy    | 32 | Maghemite              | 18 | NKT-1g basalt glass | 100 | 0.74                  |
| 2      | 59 | FeIII sulfate           | 31 | Biogenic Fe(III) oxyhy | 10 | Almandine           | 100 | 1.28                  |
| 4      | 63 | Hematite                | 14 | Pigeonite              | 23 | Roedderite          | 100 | 1.2                   |
| 5      | 26 | Coalingite              | 61 | Hematite               | 13 | Maghemite           | 100 | 1.06                  |
| 6      | 49 | FeIII dextran           | 14 | Kaolinite              | 37 | Lepidocrocite       | 100 | 0.7                   |
| 7      | 19 | FeIII sulfate           | 20 | FeIII dextran          | 61 | Ferrihydrite_2L     | 100 | 0.49                  |
| 8      | 41 | FeIII dextran           | 59 | Maghemite              | NA | NA                  | 100 | 2.27                  |
| 9      | 10 | Almandine               | 83 | FeIII sulfate          | 7  | Roedderite          | 100 | 1.48                  |
| 10     | 10 | Almandine               | 84 | Ferrihydrite_2L        | 6  | FeSi                | 100 | 0.73                  |
| 11     | 37 | Awaruite                | 17 | Fe3C                   | 46 | Fe3Si               | 100 | 2.07                  |
| 12     | 25 | FeIII phosphate hydrate | 20 | FeIII dextran          | 55 | Ferrihydrite_2L     | 100 | 0.69                  |
| 13     | 76 | Hematite                | 24 | Coalingite             | NA | NA                  | 100 | 1.59                  |
| 14     | 56 | FeIII sulfate           | 26 | FeIII pyrophosphate    | 18 | Goethite            | 100 | 0.94                  |
| 15     | 28 | Fe3C                    | 33 | Fe3Si                  | 39 | Aegirine            | 100 | 1.35                  |
| 16     | 67 | FeIII dextran           | 14 | Goethite               | 19 | Jarosite            | 100 | 1.13                  |
| 17     | 7  | Almandine               | 62 | FeIII Kaolinite        | 31 | Maghemite           | 100 | 1.32                  |

Notes: Normalized sum-square value ( $NSS=100 \times [\sum(\mu_{exp}-\mu_{fit})^2 / \sum(\mu_{exp})^2]$ ). Error on the percentages of species is estimated to be  $\pm 10\%$ . Biogenic FeIII oxyhy is biogenic Fe(III) oxyhydroxide\*

\* Toner, B., Santelli, C. M., Marcus, M. A., Wirth, R., Chan, C. S., McCollum, T., Bach, W., Edwards, K. J. (2009) "Biogenic iron oxyhydroxide formation at mid-ocean ridge hydrothermal vents: Juan de Fuca Ridge" *Geochimica et Cosmochimica Acta* 73,388-403

Figure SI5: Classification of Fe-bearing standards found by LCF in pseudo-mineral groups

|                        |                   |
|------------------------|-------------------|
| Biogenic Fe(III) oxyhy | Fe(III) oxy+org   |
| Maghemite              | Fe(III) oxide     |
| Basalt glass NKT-1     | Fe(II) silicate   |
| Fe(III) sulfate        | Fe(III) sulfate   |
| Almandine              | Fe(II) silicate   |
| Hematite               | Fe(III) oxide     |
| Pigeonite              | Fe(II) silicate   |
| Roedderite             | Fe(II) silicate   |
| Coalingite             | Fe(III) carbonate |
| Fe(III) dextran        | Fe(III) oxy+org   |
| Kaolinite              | Fe(III) silicate  |
| Lepidocrocite          | Fe(III) oxy+org   |
| Ferrihydrite2L         | Fe(III) oxy+org   |
| FeSi                   | Native            |
| Awaruite               | Native            |
| Fe <sub>3</sub> C      | Native            |
| Fe <sub>3</sub> Si     | Native            |
| Fe(III) pyrophosphate  | Fe(III) phosphate |
| Goethite               | Fe(III) oxy+org   |
| Aegirine               | Fe(III) silicate  |
| Jarosite               | Fe(III) sulfate   |

Note: “Org”: Fe(III)-organics

Figure SI6: Percentage distribution of the pseudo-mineral groups

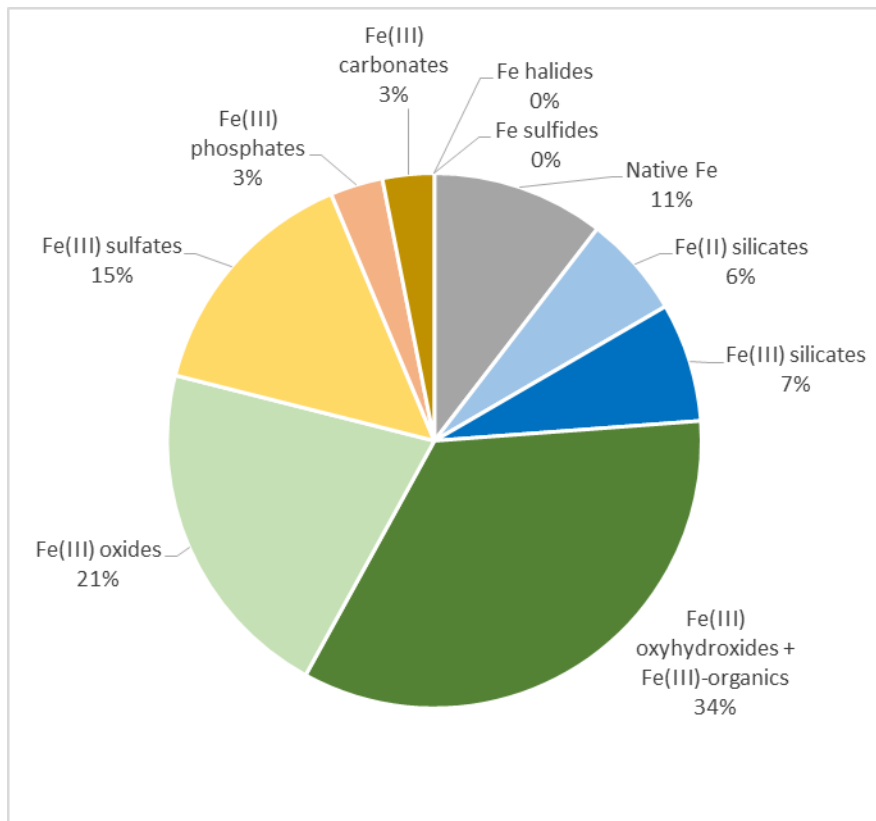

Figure S17: R<sup>2</sup> Values of different carbon species and their correlation to water-soluble iron.

| <b>CARBON<br/>NUMBER</b> | <b>ALKANE</b> | <b>SINGLE RING<br/>AROMATIC</b> | <b>POLAR</b> |
|--------------------------|---------------|---------------------------------|--------------|
| <b>12</b>                | 0.04          | 0.00                            | 0.25         |
| <b>13</b>                | 0.06          | 0.03                            | 0.17         |
| <b>14</b>                | 0.23          | 0.37                            | 0.33         |
| <b>15</b>                | 0.37          | 0.13                            | 0.33         |
| <b>16</b>                | 0.37          | 0.13                            | 0.56         |
| <b>17</b>                | 0.23          | 0.26                            | 0.28         |
| <b>18</b>                | 0.05          | 0.23                            | 0.10         |

Figure SI8: Linear correlation plots representing EF in  $\mu\text{g kg-fuel}^{-1}$  for water-soluble iron and vehical miles read from the vehical odometer. Correlation lines and  $R^2$  shown.

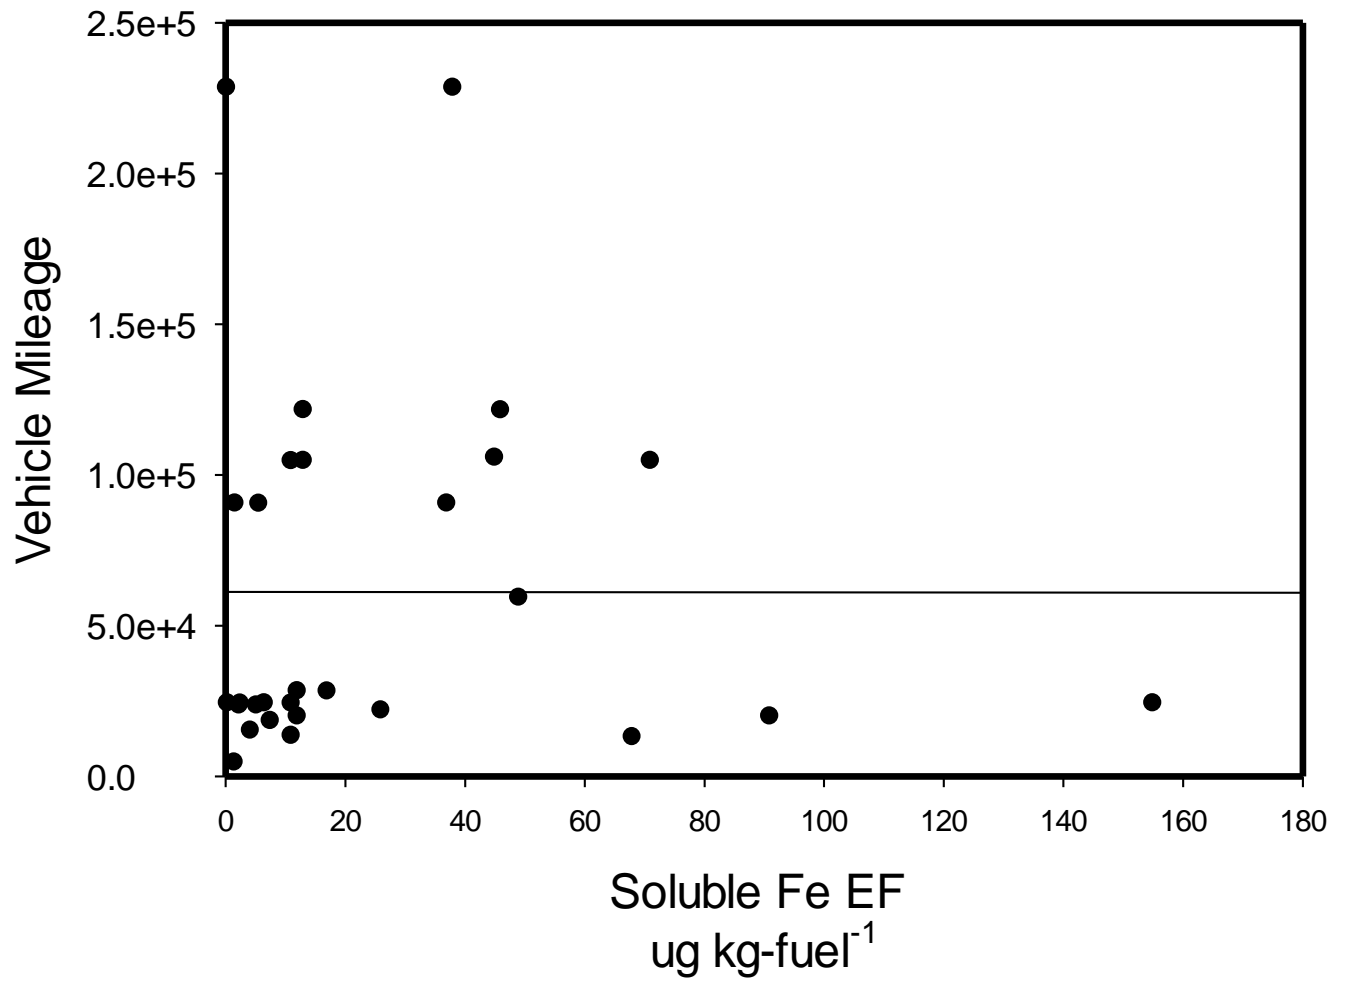

Supplement: Supplementary file 1 [file acp-2019-386-supplement.pdf]
